# Supplementary material for: Meta-analysis of associations between neutrophil-to-lymphocyte ratio and prognosis of gastric cancer
Source: Springer Nature journal article supplement (doi:10.1186/s12957-015-0530-9), 2015-03-25
Supplement: MOESM2 [file 9764664]

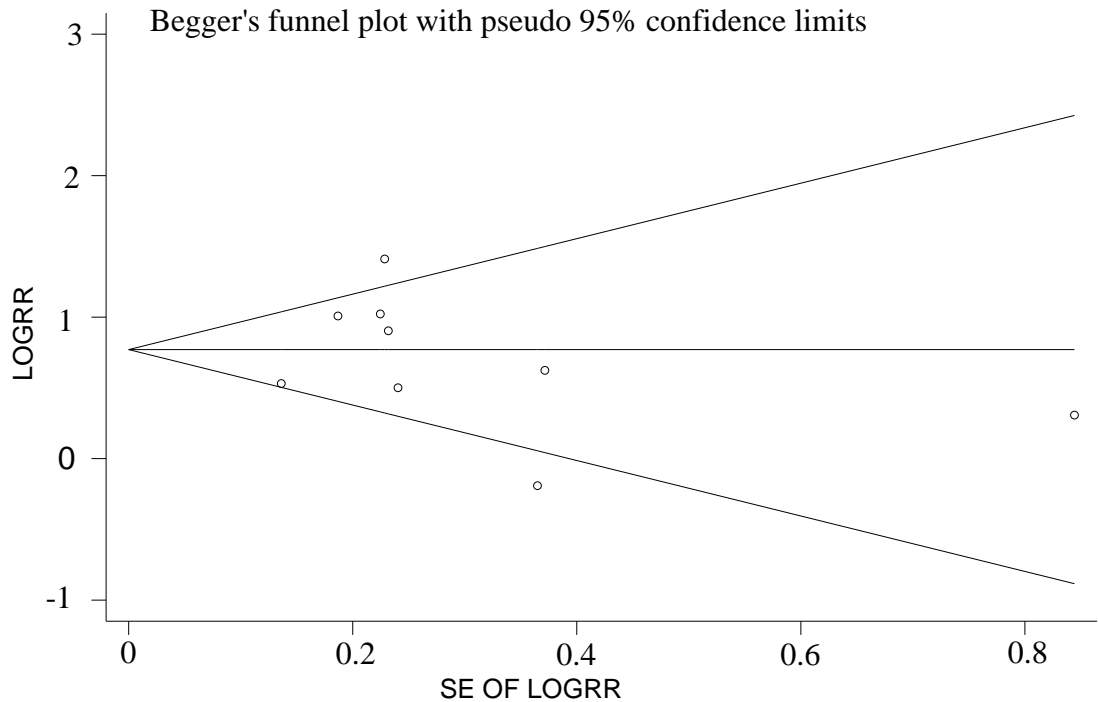

Fig. S1 Begg's funnel plot for publication bias of all studies on overall survival.
